# Supplementary material for: Comparative analysis of inflammatory signature profiles in eosinophilic and noneosinophilic chronic rhinosinusitis with nasal polyposis
Source: Oxford University Press journal article supplement (doi:10.1042/bsr20193101), 2020-02-01
Supplement: bsr-2019-3101_supp.pdf [file bsr-2019-3101_supp.pdf]

Supplementary Table S1 Comparisons of 200 inflammatory mediator levels among ECRSwNP, NECRSwNP, and control groups using cytokine antibody array

| Mediators           | Description                                                                   | Overall <i>P</i> value | Adjusted <i>P</i> value |
|---------------------|-------------------------------------------------------------------------------|------------------------|-------------------------|
| CCL21               | C-C motif chemokine 21                                                        | 0.276                  | 0.383                   |
| Axl                 | AXL oncogene                                                                  | <b>0.025</b>           | 0.066                   |
| Betacellulin        | Betacellulin                                                                  | 0.445                  | 0.520                   |
| CCL28 (MEC)         | C-C motif chemokine 28 (Mucosae-associated epithelial chemokine)              | 0.275                  | 0.383                   |
| CCL27 (CTACK)       | C-C motif chemokine 27 (Cutaneous T-cell-attracting chemokine)                | 0.586                  | 0.634                   |
| CXCL16              | C-X-C motif chemokine 16                                                      | <b>0.001</b>           | <b>0.007</b>            |
| CXCL5 (ENA-78)      | C-X-C motif chemokine 5 (Epithelial-derived neutrophil-activating protein 78) | 0.365                  | 0.468                   |
| CCL26 (Eotaxin-3)   | C-C motif chemokine 26                                                        | <b>0.007</b>           | <b>0.027</b>            |
| CXCL6 (GCP-2)       | C-X-C motif chemokine 6 (Granulocyte chemotactic protein 2)                   | 0.180                  | 0.286                   |
| CXCL1 (GRO)         | C-X-C motif chemokine 1 (Growth-regulated alpha protein)                      | <b>0.001</b>           | <b>0.007</b>            |
| CCL14 (HCC-1)       | C-C motif chemokine 14                                                        | <b>&lt;0.001</b>       | <b>&lt;0.001</b>        |
| CCL16 (HCC-4)       | C-C motif chemokine 16                                                        | <b>0.027</b>           | 0.070                   |
| IL-9                | Interleukin 9                                                                 | 0.341                  | 0.452                   |
| IL-17F              | Interleukin 17F                                                               | 0.097                  | 0.188                   |
| IL-18BP $\alpha$    | Interleukin-18-binding protein alpha                                          | 0.900                  | 0.909                   |
| IL-28A (IFNL2)      | Interleukin 28A (Interferon lambda 2)                                         | 0.390                  | 0.481                   |
| IL-29 (IFNL1)       | Interleukin 29 (Interferon lambda 1)                                          | 0.303                  | 0.415                   |
| IL-31               | Interleukin 31                                                                | 0.208                  | 0.313                   |
| CXCL10 (IP-10)      | C-X-C motif chemokine 10 (10 kDa interferon gamma-induced protein)            | 0.127                  | 0.217                   |
| CXCL11 (I-TAC)      | C-X-C motif chemokine 11 (Interferon-inducible T-cell alpha chemoattractant)  | 0.423                  | 0.507                   |
| LIF                 | Leukemia inhibitory factor                                                    | 0.151                  | 0.248                   |
| TNFSF14 (LIGHT)     | Tumor necrosis factor ligand superfamily member 14                            | 0.545                  | 0.601                   |
| XCL1 (Lymphotactin) | C motif chemokine 1                                                           | <b>0.017</b>           | 0.051                   |
| CCL8 (MCP-2)        | C-C motif chemokine 8 (Monocyte chemotactic protein 2)                        | <b>0.003</b>           | <b>0.014</b>            |

|                         |                                                                       |                  |                  |
|-------------------------|-----------------------------------------------------------------------|------------------|------------------|
| CCL7 (MCP-3)            | C-C motif chemokine 7 (Monocyte chemotactic protein 3)                | 0.431            | 0.513            |
| CCL13 (MCP-4)           | C-C motif chemokine 13 (Monocyte chemotactic protein 4)               | <b>0.030</b>     | 0.075            |
| CCL22 (MDC)             | C-C motif chemokine 22 (Macrophage-derived chemokine)                 | 0.095            | 0.186            |
| MIF                     | Macrophage migration inhibitory factor                                | 0.523            | 0.582            |
| CCL20 (MIP-3 $\alpha$ ) | C-C motif chemokine 20 (Macrophage inflammatory protein 3 alpha)      | <b>&lt;0.001</b> | <b>&lt;0.001</b> |
| CCL19 (MIP-3 $\beta$ )  | C-C motif chemokine 19 (Macrophage inflammatory protein 3 beta)       | 0.108            | 0.202            |
| CCL23 (MPIF-1)          | C-C motif chemokine 23 (Myeloid progenitor inhibitory factor 1)       | 0.275            | 0.383            |
| MSP                     | Macrophage stimulating protein                                        | <b>0.001</b>     | <b>0.007</b>     |
| CXCL7 (NAP-2)           | C-X-C motif chemokine 7 (Neutrophil-activating peptide 2)             | 0.143            | 0.238            |
| Osteopontin             | Osteopontin                                                           | 0.498            | 0.567            |
| CCL18 (PARC)            | C-C motif chemokine 18 (Pulmonary and activation-regulated chemokine) | <b>0.006</b>     | <b>0.025</b>     |
| Platelet factor 4       | Platelet factor 4                                                     | <b>0.001</b>     | <b>0.007</b>     |
| SDF-1 $\alpha$          | Stromal cell-derived factor 1 alpha                                   | 0.102            | 0.194            |
| CCL17 (TARC)            | C-C motif chemokine 17 (Thymus and activation-regulated chemokine)    | 0.127            | 0.217            |
| CCL25 (TECK)            | C-C motif chemokine 25 (Thymus-expressed chemokine)                   | 0.421            | 0.507            |
| TSLP                    | Thymic stromal lymphopoietin                                          | 0.576            | 0.626            |
| Activin A               | Activin A                                                             | <b>0.003</b>     | <b>0.014</b>     |
| AgRP                    | Agouti-related protein                                                | <b>0.044</b>     | 0.101            |
| Angiogenin              | Angiogenin                                                            | 0.221            | 0.323            |
| Angiopoietin-1          | Angiopoietin 1                                                        | <b>&lt;0.001</b> | <b>&lt;0.001</b> |
| Angiostatin             | Angiostatin                                                           | 0.142            | 0.238            |
| Cathepsin S             | Cathepsin S                                                           | 0.676            | 0.708            |
| CD40 (TNFRSF5)          | CD40 (Tumor necrosis factor receptor superfamily member 5)            | 0.054            | 0.120            |
| Cripto-1 (TDGF1)        | Teratocarcinoma-derived growth factor 1                               | <b>0.042</b>     | 0.098            |
| DAN (NBL1)              | Neuroblastoma suppressor of tumorigenicity 1                          | 0.196            | 0.299            |
| DKK-1                   | Dickkopf-related protein 1                                            | <b>0.019</b>     | 0.055            |

|                     |                                                                |                  |                  |
|---------------------|----------------------------------------------------------------|------------------|------------------|
| E-Cadherin          | Epithelial cadherin                                            | 0.110            | 0.202            |
| TROP1 (EpCAM)       | Epithelial cell adhesion molecule                              | 0.082            | 0.164            |
| Fas Ligand (TNFSF6) | Fas ligand (Tumor necrosis factor ligand superfamily member 6) | 0.183            | 0.286            |
| FcγRIIB/C           | Low affinity immunoglobulin gamma Fc region receptor II b/c    | <b>0.007</b>     | <b>0.027</b>     |
| Follistatin         | Follistatin                                                    | 0.182            | 0.286            |
| Galectin-7          | Galectin-7                                                     | 0.281            | 0.388            |
| ICAM-2 (CD102)      | Intercellular adhesion molecule 2                              | 0.059            | 0.130            |
| IL-13Rα1            | Interleukin-13 receptor subunit alpha 1                        | 0.752            | 0.779            |
| IL-13Rα2            | Interleukin-13 receptor subunit alpha 2                        | 0.072            | 0.153            |
| IL-17B              | Interleukin 17B                                                | <b>0.022</b>     | 0.060            |
| IL-2Rα              | Interleukin 2 receptor subunit alpha                           | <b>&lt;0.001</b> | <b>&lt;0.001</b> |
| IL-2Rβ              | Interleukin 2 receptor subunit beta                            | <b>0.011</b>     | <b>0.036</b>     |
| IL-23               | Interleukin 23                                                 | <b>0.004</b>     | <b>0.018</b>     |
| LAP (TGF-β1)        | Latency-associated peptide (Transforming growth factor beta 1) | 0.495            | 0.567            |
| NrCAM               | Neuronal cell adhesion molecule                                | 0.311            | 0.420            |
| PAI-1               | Plasminogen activator inhibitor 1                              | <b>0.022</b>     | 0.060            |
| PDGF-AB             | Platelet-derived growth factor AB                              | <b>0.003</b>     | <b>0.014</b>     |
| Resistin            | Resistin                                                       | <b>0.002</b>     | <b>0.011</b>     |
| SDF-1β              | Stromal cell-derived factor 1 beta                             | <b>&lt;0.001</b> | <b>&lt;0.001</b> |
| gp130               | Membrane glycoprotein 130                                      | <b>0.037</b>     | 0.089            |
| Shh-N               | Sonic hedgehog protein N-product                               | <b>0.018</b>     | 0.053            |
| Siglec-5 (CD170)    | Sialic acid-binding Ig-like lectin 5                           | <b>0.035</b>     | 0.085            |
| ST2 (IL-1 R4)       | Interleukin 1 receptor 4                                       | <b>0.030</b>     | 0.075            |
| TGF-β2              | Transforming growth factor beta 2                              | <b>0.003</b>     | <b>0.014</b>     |
| Tie-2               | Tyrosine-protein kinase receptor TIE-2                         | <b>0.021</b>     | 0.060            |
| Thrombopoietin      | Thrombopoietin                                                 | <b>&lt;0.001</b> | <b>&lt;0.001</b> |

|                |                                                                             |                  |                  |
|----------------|-----------------------------------------------------------------------------|------------------|------------------|
| TRAILR4        | TNF-related apoptosis-inducing ligand receptor 4                            | <b>0.011</b>     | <b>0.036</b>     |
| TREM-1         | Triggering receptor expressed on myeloid cells 1                            | <b>0.001</b>     | <b>0.007</b>     |
| VEGF-C         | Vascular endothelial growth factor C                                        | 0.200            | 0.303            |
| VEGFR1         | Vascular endothelial growth factor receptor 1                               | <b>0.048</b>     | 0.109            |
| Amphiregulin   | Amphiregulin                                                                | 0.080            | 0.163            |
| BDNF           | Brain-derived neurotrophic factor                                           | 0.503            | 0.568            |
| bFGF           | Basic fibroblast growth factor                                              | <b>&lt;0.001</b> | <b>&lt;0.001</b> |
| BMP-4          | Bone morphogenetic protein 4                                                | 0.101            | 0.194            |
| BMP-5          | Bone morphogenetic protein 5                                                | 0.266            | 0.377            |
| BMP-7          | Bone morphogenetic protein 7                                                | 0.387            | 0.481            |
| $\beta$ -NGF   | Beta nerve growth factor                                                    | <b>0.039</b>     | 0.093            |
| EGF            | Epidermal growth factor                                                     | <b>0.001</b>     | <b>0.007</b>     |
| EGFR           | Epidermal growth factor receptor                                            | <b>0.002</b>     | <b>0.011</b>     |
| EG-VEGF (PK1)  | Endocrine-gland-derived vascular endothelial growth factor (Prokineticin 1) | 0.653            | 0.696            |
| FGF-4          | Fibroblast growth factor 4                                                  | 0.166            | 0.268            |
| FGF-7 (KGF)    | Fibroblast growth factor 7 (Keratinocyte growth factor)                     | 0.374            | 0.473            |
| GDF-15         | Growth differentiation factor 15                                            | <b>0.001</b>     | <b>0.007</b>     |
| GDNF           | Glial cell line-derived neurotrophic factor                                 | 0.602            | 0.647            |
| Growth hormone | Growth hormone                                                              | 0.251            | 0.361            |
| HB-EGF         | Heparin-binding EGF-like growth factor                                      | 0.547            | 0.601            |
| HGF            | Hepatocyte growth factor                                                    | <b>&lt;0.001</b> | <b>&lt;0.001</b> |
| IGFBP-1        | Insulin-like growth factor-binding protein 1                                | 0.122            | 0.216            |
| IGFBP-2        | Insulin-like growth factor-binding protein 2                                | <b>0.008</b>     | <b>0.030</b>     |
| IGFBP-3        | Insulin-like growth factor-binding protein 3                                | <b>0.002</b>     | <b>0.011</b>     |
| IGFBP-4        | Insulin-like growth factor-binding protein 4                                | 0.968            | 0.968            |
| IGFBP-6        | Insulin-like growth factor-binding protein 6                                | 0.370            | 0.471            |

|                    |                                                                                     |                  |                  |
|--------------------|-------------------------------------------------------------------------------------|------------------|------------------|
| IGF-1              | Insulin-like growth factor 1                                                        | 0.699            | 0.728            |
| Insulin            | Insulin                                                                             | <b>0.010</b>     | <b>0.035</b>     |
| M-CSFR             | Macrophage colony stimulating factor 1 receptor                                     | <b>0.001</b>     | <b>0.007</b>     |
| NGFR (TNFRSF16)    | Nerve growth factor receptor (Tumor necrosis factor receptor superfamily member 16) | 0.388            | 0.481            |
| NT-3               | Neurotrophin 3                                                                      | 0.165            | 0.268            |
| NT-4               | Neurotrophin 4                                                                      | 0.794            | 0.819            |
| Osteoprotegerin    | Osteoprotegerin                                                                     | 0.890            | 0.904            |
| PDGF-AA            | Platelet-derived growth factor AA                                                   | <b>&lt;0.001</b> | <b>&lt;0.001</b> |
| PLGF               | Placenta growth factor                                                              | 0.663            | 0.702            |
| SCF                | Stem cell factor                                                                    | 0.568            | 0.621            |
| CD117 (SCFR)       | CD117 (Stem cell factor receptor)                                                   | 0.385            | 0.481            |
| TGF- $\alpha$      | Transforming growth factor alpha                                                    | 0.838            | 0.855            |
| TGF- $\beta$ 1     | Transforming growth factor beta 1                                                   | 0.125            | 0.217            |
| TGF- $\beta$ 3     | Transforming growth factor beta 3                                                   | 0.524            | 0.582            |
| VEGF-A             | Vascular endothelial growth factor A                                                | <b>0.006</b>     | <b>0.025</b>     |
| VEGFR2             | Vascular endothelial growth factor receptor 2                                       | 0.404            | 0.493            |
| VEGFR3             | Vascular endothelial growth factor receptor 3                                       | 0.360            | 0.465            |
| VEGF-D             | Vascular endothelial growth factor D                                                | 0.654            | 0.696            |
| CXCL13 (BLC)       | C-X-C motif chemokine 13 (B lymphocyte chemoattractant)                             | <b>0.005</b>     | <b>0.022</b>     |
| CCL11 (Eotaxin-1)  | C-C motif chemokine 11                                                              | <b>0.003</b>     | <b>0.014</b>     |
| CCL24 (Eotaxin-2)  | C-C motif chemokine 24                                                              | <b>&lt;0.001</b> | <b>&lt;0.001</b> |
| G-CSF              | Granulocyte colony-stimulating factor                                               | <b>&lt;0.001</b> | <b>&lt;0.001</b> |
| GM-CSF             | Granulocyte-macrophage colony-stimulating factor                                    | <b>0.035</b>     | 0.085            |
| I-309 (TCA-3/CCL1) | C-C motif chemokine 1                                                               | 0.408            | 0.495            |
| CD54 (ICAM-1)      | CD54 (Intercellular adhesion molecule 1)                                            | 0.253            | 0.361            |
| IFN- $\gamma$      | Interferon gamma                                                                    | 0.111            | 0.202            |

|                         |                                                                                                |                  |                  |
|-------------------------|------------------------------------------------------------------------------------------------|------------------|------------------|
| IL-1 $\alpha$           | Interleukin 1 alpha                                                                            | 0.218            | 0.323            |
| IL-1 $\beta$            | Interleukin 1 beta                                                                             | 0.079            | 0.163            |
| IL-1ra                  | Interleukin 1 receptor antagonist                                                              | <b>0.013</b>     | <b>0.041</b>     |
| IL-2                    | Interleukin 2                                                                                  | <b>0.022</b>     | 0.060            |
| IL-4                    | Interleukin 4                                                                                  | <b>0.014</b>     | <b>0.043</b>     |
| IL-5                    | Interleukin 5                                                                                  | <b>0.015</b>     | <b>0.045</b>     |
| IL-6                    | Interleukin 6                                                                                  | 0.060            | 0.130            |
| IL-6R                   | Interleukin 6 receptor subunit alpha                                                           | 0.356            | 0.464            |
| IL-7                    | Interleukin 7                                                                                  | <b>0.023</b>     | 0.061            |
| IL-8 (CXCL8)            | Interleukin 8 (C-X-C motif chemokine 8)                                                        | 0.170            | 0.272            |
| IL-10                   | Interleukin 10                                                                                 | <b>0.001</b>     | <b>0.007</b>     |
| IL-11                   | Interleukin 11                                                                                 | 0.052            | 0.117            |
| IL-12p40                | Interleukin 12 p40                                                                             | 0.443            | 0.520            |
| IL-12p70                | Interleukin 12 p70                                                                             | <b>0.003</b>     | <b>0.014</b>     |
| IL-13                   | Interleukin 13                                                                                 | <b>0.010</b>     | <b>0.035</b>     |
| IL-15                   | Interleukin 15                                                                                 | <b>0.002</b>     | <b>0.011</b>     |
| IL-16                   | Interleukin 16                                                                                 | 0.669            | 0.704            |
| IL-17A                  | Interleukin 17A                                                                                | <b>0.002</b>     | <b>0.011</b>     |
| CCL2 (MCP-1)            | C-C motif chemokine 2 (Monocyte chemotactic protein 1)                                         | <b>&lt;0.001</b> | <b>&lt;0.001</b> |
| M-CSF                   | Macrophage colony-stimulating factor 1                                                         | 0.082            | 0.164            |
| CXCL9 (MIG)             | C-X-C motif chemokine 9 (Monokine induced by interferon gamma)                                 | 0.357            | 0.464            |
| CCL3 (MIP-1 $\alpha$ )  | C-C motif chemokine 3 (Macrophage inflammatory protein 1 alpha)                                | 0.190            | 0.294            |
| CCL4 (MIP-1 $\beta$ )   | C-C motif chemokine 4 (Macrophage inflammatory protein 1 beta)                                 | 0.126            | 0.217            |
| CCL15 (MIP-1 $\delta$ ) | C-C motif chemokine 15 (Macrophage inflammatory protein 1 delta)                               | <b>0.010</b>     | <b>0.035</b>     |
| PDGF-BB                 | Platelet-derived growth factor BB                                                              | <b>0.011</b>     | <b>0.036</b>     |
| CCL5 (RANTES)           | C-C motif chemokine 5 (Regulated upon activation, normal T cell expressed and secreted factor) | 0.930            | 0.935            |

|                  |                                                                                                                              |                  |                  |
|------------------|------------------------------------------------------------------------------------------------------------------------------|------------------|------------------|
| TIMP-1           | Tissue inhibitor of metalloproteinases 1                                                                                     | 0.333            | 0.444            |
| TIMP-2           | Tissue inhibitor of metalloproteinases 2                                                                                     | 0.220            | 0.323            |
| TNF- $\alpha$    | Tumor necrosis factor alpha                                                                                                  | 0.244            | 0.354            |
| TNF- $\beta$     | Tumor necrosis factor beta                                                                                                   | 0.499            | 0.567            |
| TNFR1            | Tumor necrosis factor receptor 1                                                                                             | <b>0.003</b>     | <b>0.014</b>     |
| TNFR2            | Tumor necrosis factor receptor 2                                                                                             | <b>0.011</b>     | <b>0.036</b>     |
| CD137            | CD137                                                                                                                        | 0.087            | 0.172            |
| CD166 (ALCAM)    | CD166 (Activated leukocyte cell adhesion molecule)                                                                           | 0.074            | 0.156            |
| CD80             | CD80                                                                                                                         | 0.803            | 0.824            |
| BCMA (TNFRSF17)  | B-cell maturation protein (Tumor necrosis factor receptor superfamily member 17)                                             | 0.350            | 0.461            |
| CD14             | CD14                                                                                                                         | <b>&lt;0.001</b> | <b>&lt;0.001</b> |
| CD30 (TNFRSF8)   | CD30 (Tumor necrosis factor receptor superfamily member 8)                                                                   | 0.308            | 0.419            |
| CD40 Ligand      | CD40 ligand                                                                                                                  | <b>0.029</b>     | 0.074            |
| CEACAM-1         | Carcinoembryonic antigen-related cell adhesion molecule 1                                                                    | <b>0.002</b>     | <b>0.011</b>     |
| DR6 (TNFRSF21)   | Death receptor 6 (Tumor necrosis factor receptor superfamily member 21)                                                      | <b>0.023</b>     | 0.061            |
| Dtk (TYRO3)      | Tyrosine-protein kinase receptor TYRO3                                                                                       | 0.215            | 0.321            |
| CD105 (Endoglin) | CD105 (Endoglin)                                                                                                             | <b>0.007</b>     | <b>0.027</b>     |
| ErbB3            | Receptor tyrosine-protein kinase erbB-3                                                                                      | <b>&lt;0.001</b> | <b>&lt;0.001</b> |
| E-Selectin       | E-Selectin                                                                                                                   | 0.447            | 0.520            |
| Fas              | Apoptosis-mediating surface antigen FAS                                                                                      | 0.110            | 0.202            |
| Flt-3 Ligand     | Fms-related tyrosine kinase 3 ligand                                                                                         | <b>0.008</b>     | <b>0.030</b>     |
| GITR (TNFRSF18)  | Glucocorticoid-induced tumor necrosis factor receptor related protein (Tumor necrosis factor receptor superfamily member 18) | <b>0.003</b>     | <b>0.014</b>     |
| HVEM (TNFRSF14)  | Herpes virus entry mediator A (Tumor necrosis factor receptor superfamily member 14)                                         | 0.440            | 0.520            |
| CD50 (ICAM-3)    | CD50 (Intercellular adhesion molecule 3)                                                                                     | 0.148            | 0.245            |
| Contactin-2      | Contactin-2                                                                                                                  | 0.468            | 0.541            |
| IL-1R1           | Interleukin 1 receptor type 1                                                                                                | 0.109            | 0.202            |

|                    |                                                                   |                  |                  |
|--------------------|-------------------------------------------------------------------|------------------|------------------|
| IL-2R $\gamma$     | Interleukin 2 receptor gamma                                      | 0.191            | 0.294            |
| IL-10R $\beta$     | Interleukin 10 receptor beta                                      | 0.128            | 0.217            |
| IL-17RA            | Interleukin 17 receptor A                                         | <b>0.014</b>     | <b>0.043</b>     |
| IL-21R             | Interleukin 21 receptor                                           | 0.080            | 0.163            |
| LIMP2              | Lysosomal integral membrane protein 2                             | <b>0.002</b>     | <b>0.011</b>     |
| Lipocalin-2 (NGAL) | Lipocalin 2 (Neutrophil gelatinase-associated lipocalin)          | <b>&lt;0.001</b> | <b>&lt;0.001</b> |
| L-Selectin         | L-Selectin                                                        | <b>0.002</b>     | <b>0.011</b>     |
| LYVE-1             | Lymphatic vessel endothelial hyaluronic acid receptor 1           | <b>0.013</b>     | <b>0.041</b>     |
| MICA               | MHC class I polypeptide-related sequence A                        | <b>0.008</b>     | <b>0.030</b>     |
| MICB               | MHC class I polypeptide-related sequence B                        | 0.112            | 0.202            |
| NRG1- $\beta$ 1    | Neuregulin 1 beta 1                                               | 0.117            | 0.209            |
| PDGFR $\beta$      | Platelet-derived growth factor receptor beta                      | 0.065            | 0.140            |
| CD31 (PECAM-1)     | CD31 (Platelet endothelial cell adhesion molecule 1)              | 0.515            | 0.579            |
| RAGE               | Receptor for advanced glycation end products                      | <b>&lt;0.001</b> | <b>&lt;0.001</b> |
| TIM-1 (KIM-1)      | T cell immunoglobulin mucin receptor 1 (Kidney injury molecule 1) | <b>0.004</b>     | <b>0.018</b>     |
| TRAILR3            | TNF-related apoptosis-inducing ligand receptor 3                  | <b>&lt;0.001</b> | <b>&lt;0.001</b> |
| Trappin-2          | Trappin-2                                                         | 0.397            | 0.487            |
| uPAR               | Urokinase plasminogen activator surface receptor                  | <b>&lt;0.001</b> | <b>&lt;0.001</b> |
| VCAM-1             | Vascular cell adhesion molecule 1                                 | <b>0.041</b>     | 0.096            |
| XEDAR              | X-linked ectodysplasin-A2 receptor                                | 0.325            | 0.436            |

Overall *P* values were determined among ECRSwNP, NECRSwNP, and control groups using the Kruskal-Wallis *H* tests. Adjusted *P* values were calculated by Benjamini-Hochberg false discovery rate correction for multiple comparisons.

The significant values are indicated in bold.



Supplementary Table S2 Protein levels of 66 inflammatory mediators among ECRSwNP, NECRSwNP, and control groups

| Mediators (pg/ml)       | Control                    | NECRSwNP                 | ECRSwNP                   | <i>P</i> * value                             |
|-------------------------|----------------------------|--------------------------|---------------------------|----------------------------------------------|
| CXCL16                  | 143.47 (122.89-158.78)     | 252.31 (197.12-329.94)   | 190.85 (171.52-261.17)    | < <b>0.001</b> , <b>0.003</b> , 0.134        |
| CCL26 (Eotaxin-3)       | 0 (0-0)                    | 0 (0-8.81)               | 8.08 (2.67-34.2)          | 0.464, <b>0.007</b> , <b>0.028</b>           |
| CXCL1 (GRO)             | 26.26 (15.8-63.47)         | 100.04 (84.91-127.67)    | 124.6 (51.19-188.85)      | < <b>0.001</b> , <b>0.004</b> , 0.787        |
| CCL14 (HCC-1)           | 237.82 (222.88-245.3)      | 141.68 (126.79-168.75)   | 158.01 (133.81-184.09)    | < <b>0.001</b> , < <b>0.001</b> , 0.602      |
| CCL8 (MCP-2)            | 12.16 (9.11-20.61)         | 0 (0-4.74)               | 5.26 (0-9.43)             | <b>0.002</b> , <b>0.009</b> , 0.285          |
| CCL20 (MIP-3 $\alpha$ ) | 0.31 (0.04-0.74)           | 5.45 (2-12.17)           | 1.2 (0.8-3.64)            | < <b>0.001</b> , <b>0.025</b> , <b>0.039</b> |
| MSP                     | 0 (0-0)                    | 13.55 (0.53-60.85)       | 14.45 (10.75-46.83)       | <b>0.003</b> , < <b>0.001</b> , 0.662        |
| CCL18 (PARC)            | 0 (0-1.86)                 | 1.46 (0-5.52)            | 15.9 (11.99-19.53)        | 0.436, <b>0.006</b> , <b>0.010</b>           |
| Platelet factor 4       | 9846.86 (7440.35-11411.69) | 1172.11 (298.36-3618.96) | 2953.91 (1059.65-7153.99) | < <b>0.001</b> , <b>0.002</b> , 0.215        |
| Activin A               | 6.39 (0-24.18)             | 211.03 (141.65-318.62)   | 97.81 (0-278.76)          | < <b>0.001</b> , 0.123, 0.172                |
| Angiotensin-1           | 366.09 (326.93-455.6)      | 145.55 (75.77-191.61)    | 160.78 (109.36-193.12)    | < <b>0.001</b> , < <b>0.001</b> , 0.662      |
| Fc $\gamma$ RIIB/C      | 502.46 (407.69-812.31)     | 1136.36 (911.07-1400.57) | 970.12 (597.32-1281.46)   | <b>0.001</b> , 0.050, 0.232                  |
| IL-2R $\alpha$          | 9.52 (7.84-11.92)          | 35.72 (26.64-65.06)      | 55.8 (31.75-78.81)        | < <b>0.001</b> , < <b>0.001</b> , 0.267      |
| IL-2R $\beta$           | 6.89 (0.34-20.93)          | 54.63 (36.57-87.13)      | 46.01 (22.62-79.98)       | <b>0.003</b> , <b>0.030</b> , 0.391          |
| IL-23                   | 10.86 (0.27-13.48)         | 28.51 (21.44-34.2)       | 26.07 (21.85-43.12)       | <b>0.001</b> , <b>0.004</b> , 0.983          |
| PDGF-AB                 | 36.11 (15.18-71.58)        | 2.44 (0-25.07)           | 0.22 (0-1.01)             | <b>0.040</b> , < <b>0.001</b> , 0.104        |
| Resistin                | 309.96 (243.06-421.5)      | 509.28 (409.08-729.51)   | 319.09 (222.24-414.29)    | <b>0.004</b> , 0.923, <b>0.003</b>           |
| SDF-1 $\beta$           | 2.49 (0.59-4.1)            | 13.83 (10.57-19.48)      | 8.87 (7.27-13.86)         | < <b>0.001</b> , < <b>0.001</b> , 0.124      |
| TGF- $\beta$ 2          | 0 (0-1.38)                 | 4.63 (2.48-8.13)         | 1.37 (0-2.84)             | <b>0.004</b> , 0.346, <b>0.008</b>           |
| Thrombopoietin          | 480.67 (334.25-608.13)     | 1013.39 (785.01-1253.54) | 813.27 (696.13-922.02)    | < <b>0.001</b> , < <b>0.001</b> , 0.285      |
| TRAILR4                 | 0 (0-2.45)                 | 5.48 (3.45-15.64)        | 4.84 (2.06-8.25)          | <b>0.004</b> , <b>0.036</b> , 0.249          |
| TREM-1                  | 7.61 (0-30.73)             | 47.33 (35.04-69.51)      | 14.3 (9.16-32.96)         | < <b>0.001</b> , 0.254, <b>0.002</b>         |
| bFGF                    | 3250.94 (2080-4428.12)     | 687.85 (278.86-919.84)   | 317.59 (164.41-575.21)    | < <b>0.001</b> , < <b>0.001</b> , 0.172      |
| EGF                     | 5.34 (3.67-7.21)           | 1 (0.33-2.57)            | 0.91 (0.54-1.25)          | <b>0.003</b> , < <b>0.001</b> , 0.723        |

|                   |                          |                           |                           |                                              |
|-------------------|--------------------------|---------------------------|---------------------------|----------------------------------------------|
| EGFR              | 1828.94 (1637.76-2741.6) | 1152.51 (982.37-1564.14)  | 1248.74 (916.54-1462.7)   | < <b>0.001</b> , <b>0.003</b> , 0.787        |
| GDF-15            | 30.92 (25.98-43.16)      | 187.71 (107.44-426.93)    | 169.62 (111.88-302.34)    | < <b>0.001</b> , < <b>0.001</b> , 0.755      |
| HGF               | 405.89 (300.73-461.66)   | 177.31 (156.05-250.76)    | 153.8 (77.54-187.21)      | < <b>0.001</b> , < <b>0.001</b> , 0.113      |
| IGFBP-2           | 429.06 (298.35-657.38)   | 808.92 (403.5-1512.67)    | 1012.34 (718.34-1205.77)  | <b>0.010</b> , <b>0.002</b> , 0.787          |
| IGFBP-3           | 648.86 (349.57-1103.96)  | 2591.49 (1060.39-3952.26) | 3295.19 (2087.64-4625.84) | <b>0.004</b> , < <b>0.001</b> , 0.368        |
| Insulin           | 135.68 (102.86-159.6)    | 53.23 (0-104.07)          | 96.79 (52.91-150.74)      | <b>0.003</b> , 0.180, 0.087                  |
| M-CSFR            | 118.56 (69.78-169.87)    | 319.59 (250.22-576.62)    | 239.84 (195.94-293.56)    | < <b>0.001</b> , < <b>0.001</b> , 0.095      |
| PDGF-AA           | 12.39 (9.1-17.36)        | 1.89 (0.66-3.46)          | 1.7 (1.41-2.29)           | < <b>0.001</b> , < <b>0.001</b> , 0.851      |
| VEGF-A            | 7.41 (6.42-10.89)        | 4.09 (3.19-5.69)          | 4.9 (4.21-5.89)           | <b>0.002</b> , <b>0.009</b> , 0.573          |
| CXCL13 (BLC)      | 0.08 (0-0.61)            | 2.72 (1.02-16.11)         | 2.03 (0.54-20.07)         | < <b>0.001</b> , <b>0.017</b> , 0.632        |
| CCL11 (Eotaxin-1) | 0 (0-0.29)               | 3.66 (0.53-7.22)          | 9.79 (3.26-22.46)         | <b>0.012</b> , <b>0.003</b> , 0.087          |
| CCL24 (Eotaxin-2) | 6.93 (5.2-14.26)         | 33.87 (14.05-84.89)       | 299.19 (91.9-582.69)      | <b>0.001</b> , < <b>0.001</b> , <b>0.003</b> |
| G-CSF             | 0 (0-0)                  | 78.72 (30.94-279.51)      | 36.08 (16.15-56.16)       | < <b>0.001</b> , < <b>0.001</b> , 0.158      |
| IL-1ra            | 0.14 (0-13.21)           | 29.03 (10.93-37.65)       | 34.72 (25.28-49.38)       | <b>0.024</b> , <b>0.004</b> , 0.285          |
| IL-4              | 0.14 (0-0.81)            | 0.3 (0.03-1.32)           | 2.34 (1.25-2.91)          | 0.524, <b>0.007</b> , <b>0.017</b>           |
| IL-5              | 0.27 (0-1.1)             | 0 (0-1.56)                | 3.01 (0.69-5.17)          | 0.759, <b>0.017</b> , <b>0.013</b>           |
| IL-10             | 0.39 (0.14-0.63)         | 0.39 (0-0.96)             | 1.78 (1.04-2.12)          | 1.000, < <b>0.001</b> , < <b>0.001</b>       |
| IL-12p70          | 0.03 (0-0.14)            | 0.08 (0-0.23)             | 0.43 (0.28-0.66)          | 0.588, <b>0.003</b> , <b>0.002</b>           |
| IL-13             | 0.11 (0-0.34)            | 0.29 (0-0.5)              | 0.88 (0.42-1.66)          | 0.286, <b>0.003</b> , <b>0.025</b>           |
| IL-15             | 0 (0-5.01)               | 10.88 (0-42.62)           | 57.83 (29.13-82.73)       | 0.208, <b>0.001</b> , <b>0.008</b>           |
| IL-17A            | 0.08 (0-0.39)            | 0.66 (0.32-1.53)          | 1.08 (0.68-1.23)          | <b>0.006</b> , < <b>0.001</b> , 0.439        |
| CCL2 (MCP-1)      | 12.48 (9.68-14.37)       | 75.8 (32.36-97.24)        | 42.26 (31.29-61.95)       | < <b>0.001</b> , < <b>0.001</b> , 0.368      |
| CCL15 (MIP-1δ)    | 2.17 (0.14-3.61)         | 11.59 (0.73-15.77)        | 10.28 (6.56-16.65)        | 0.057, < <b>0.001</b> , 0.632                |
| PDGF-BB           | 23.97 (10.75-41.06)      | 8.04 (2.46-11.47)         | 6.37 (4.38-7.99)          | <b>0.024</b> , <b>0.002</b> , 0.518          |
| TNFR1             | 111.61 (50.02-131.63)    | 206.96 (160.96-308.87)    | 159.73 (85.65-198.15)     | < <b>0.001</b> , 0.093, 0.113                |
| TNFR2             | 287.01 (224.28-398.46)   | 818.35 (477.13-1449.62)   | 412.38 (203.91-686.44)    | <b>0.003</b> , 0.418, 0.065                  |

|                    |                           |                           |                           |                                    |
|--------------------|---------------------------|---------------------------|---------------------------|------------------------------------|
| CD14               | 2062.31 (1748.39-2383.65) | 4971.86 (4071.34-6423.26) | 3938.16 (2716.8-4757.09)  | <b>&lt;0.001, 0.009, 0.039</b>     |
| CEACAM-1           | 183.01 (159.99-201.84)    | 238.61 (190.6-342.18)     | 298.18 (247.29-592.78)    | <b>0.031, &lt;0.001, 0.072</b>     |
| CD105 (Endoglin)   | 3048.71 (2840.73-3611.05) | 2154.96 (1438.25-2856.68) | 1514.3 (1264.28-2165.2)   | <b>0.016, 0.002, 0.267</b>         |
| ErbB3              | 5891.85 (4846.56-7997.64) | 1433.21 (541.37-1924.77)  | 1011.79 (121.97-2105.73)  | <b>&lt;0.001, &lt;0.001, 0.602</b> |
| Flt-3 Ligand       | 13.24 (8.41-24.84)        | 3.91 (2.24-6.47)          | 2.48 (1.81-9.39)          | <b>0.006, 0.004, 0.632</b>         |
| GITR (TNFRSF18)    | 2.99 (0-7.01)             | 16.06 (9-29.15)           | 7.72 (4.92-15.6)          | <b>0.001, 0.080, 0.035</b>         |
| IL-17RA            | 9 (6.57-12.73)            | 14.98 (11.39-21.31)       | 20.7 (13.24-26)           | <b>0.024, 0.004, 0.346</b>         |
| LIMPII             | 30.02 (16.56-35.36)       | 7.89 (2.82-12.82)         | 7.85 (1.93-11.34)         | <b>0.001, &lt;0.001, 0.632</b>     |
| Lipocalin-2 (NGAL) | 2673 (2263.17-2761.73)    | 3957.21 (3290.64-4334.54) | 3261.41 (2693.88-3306.59) | <b>&lt;0.001, 0.107, 0.004</b>     |
| L-Selectin         | 1267.05 (897.5-1701.16)   | 3263.37 (2183.15-3872.34) | 2457.56 (1799.68-4108.86) | <b>&lt;0.001, 0.006, 0.692</b>     |
| LYVE-1             | 149.16 (81.94-238.25)     | 450.46 (251.05-647.07)    | 313.42 (259.86-846.24)    | <b>0.005, 0.014, 0.787</b>         |
| MICA               | 8.43 (5.58-12.35)         | 17.54 (13.41-24.65)       | 13.43 (12.23-17.41)       | <b>0.004, 0.025, 0.172</b>         |
| RAGE               | 41.63 (24.44-74.78)       | 2.82 (1.35-10.37)         | 10 (5.33-16.28)           | <b>&lt;0.001, &lt;0.001, 0.095</b> |
| TIM-1 (KIM-1)      | 1.03 (0-4.67)             | 11.91 (7.05-15.01)        | 6.15 (4.04-11.56)         | <b>0.001, 0.011, 0.249</b>         |
| TRAILR3            | 0.79 (0.05-1.84)          | 24.59 (12.94-39.36)       | 45.71 (29.23-96.41)       | <b>&lt;0.001, &lt;0.001, 0.124</b> |
| uPAR               | 15.97 (0-27.53)           | 320.44 (139.9-507.79)     | 210.83 (163.84-393.89)    | <b>&lt;0.001, &lt;0.001, 0.573</b> |

Data are expressed as medians (interquartile ranges).

\* *P* value: NECRSwNP vs. Control, ECRSwNP vs. Control, and ECRSwNP vs. NECRSwNP, respectively. *P* values were obtained from the Mann-Whitney *U* test.

The significant values are indicated in bold.

Abbreviations: CXCL, C-X-C motif chemokine; CCL, C-C motif chemokine; GRO, growth-regulated alpha protein; MCP-2, monocyte chemotactic protein 2; MIP-3 $\alpha$ , macrophage inflammatory protein 3 alpha; MSP, macrophage stimulating protein; PARC, pulmonary and activation-regulated chemokine; Fc $\gamma$ RIIB/C, low affinity immunoglobulin gamma Fc region receptor II b/c; IL-2R $\alpha$ , interleukin 2 receptor subunit alpha; IL-2R $\beta$ , interleukin 2 receptor subunit beta; PDGF-AB, platelet-derived growth factor AB; SDF-1 $\beta$ , stromal cell-derived factor 1 beta; TGF- $\beta$ 2, transforming growth factor beta 2; TRAILR4, TNF-related apoptosis-inducing ligand receptor 4; TREM-1, triggering receptor expressed on myeloid cells 1; bFGF, basic fibroblast growth factor; EGF, epidermal growth factor; EGFR, epidermal growth factor receptor; GDF-15, growth differentiation factor 15; HGF, hepatocyte growth factor; IGFBP-2, insulin-like growth factor-binding protein 2; IGFBP-3, insulin-like growth factor-binding protein 3; M-CSFR, macrophage colony stimulating factor 1 receptor; PDGF-AA, platelet-derived growth factor AA; VEGF-A, vascular endothelial growth

factor A; BLC, B lymphocyte chemoattractant; G-CSF, granulocyte colony-stimulating factor; IL-1ra, interleukin 1 receptor antagonist; MCP-1, monocyte chemotactic protein 1; MIP-1 $\delta$ , macrophage inflammatory protein 1 delta; PDGF-BB, platelet-derived growth factor BB; TNFR1, tumor necrosis factor receptor 1; TNFR2, tumor necrosis factor receptor 2; CEACAM-1, carcinoembryonic antigen-related cell adhesion molecule 1; ErbB3, receptor tyrosine-protein kinase erbB-3; Flt-3 Ligand, fms-related tyrosine kinase 3 ligand; GITR, glucocorticoid-induced tumor necrosis factor receptor related protein; TNFRSF18, tumor necrosis factor receptor superfamily member 18; IL-17RA, interleukin 17 receptor A; LIMP2, lysosomal integral membrane protein 2; NGAL, neutrophil gelatinase-associated lipocalin; LYVE-1, lymphatic vessel endothelial hyaluronic acid receptor 1; MICA, MHC class I polypeptide-related sequence A; RAGE, receptor for advanced glycation end products; TIM-1, T cell immunoglobulin mucin receptor 1 ; KIM-1, kidney injury molecule 1; TRAILR3, TNF-related apoptosis-inducing ligand receptor 3; uPAR, urokinase plasminogen activator surface receptor; ECRSwNP, eosinophilic chronic rhinosinusitis with nasal polyposis; NECRSwNP, noneosinophilic chronic rhinosinusitis with nasal polyposis.
